# Supplementary material
Source: publisher figshare collection journal article supplement (https://tandf.figshare.com/ndownloader/files/21599607)
Supplement: Supplementary file 1 [file 21599607]

Spanish-English translation

| Spanish (Español) | English |
| --- | --- |
| ¿sabes? Primero, la idea de las mujeres y el riesgo no checan, incluso hoy si ves a un hombre hacer algo riesgoso, es normal ¿no? …pero si es una mujer, entonces es una loura, incluso si no tienes hijos. | you know women... first is contrary to the idea of risking a woman, even now if it is a men the one doing a risking activity is regarded as normal... but it is still considered madness just because you are a woman, even if you don’t want to have children. |
| Hay quien no entiende la razón por la que hago esto, te toman por loca…y es peor cuando estás embarazada, hasta mi mamá estaba en contra. | Some people didn’t understand why I liked to practice adventure activities, they took me for a fool...well, it was worse when I became pregnant, even my mother didn’t approve it. |
| De plano dejé de hacer rápidos II ó III, pero no dejé de hacerlo en aguas planas, o cambié de tipo de kayak de uno de una plaza a un tandem pero mi doctor me dijo de seguir con el kayak los primeros meses del embarazo y así hasta que yo lo considerara correcto, que no fuera muy fuerte la actividad y eso fue Bueno porque entonces yo.. relax. | I stopped doing II or III class rafting, but I kept kayaking in flat waters, or if I was used to a solo kayak I changed to a tandem kayak, but my doctor told me I could keep practicing during the first months of pregnancy and until I considered and it wasn’t strenuous activity and I think it was good because it helped me to relax. |
| Era una persona sana y el medico me dijo que el ascenso era una actividad de riesgo para una embarazada hasta en los primeros meses. Me asusté y luego me dijeron que mi seguro medico no cubría accidents durante el embarazo, las agencias no querían llevarme. Algunas veces salí con mis amigos… me sentía enojada no era justo… Dejé de practicar 3 ó 4 años. Ahora lo veo y pienso que no debí parar pero en ese entonces seguí el consejo de otros sobre no hacer actividades de riesgo. | I was healthy but physicians considered climbing as a high risk activity for a pregnant woman even during the first months. I got scared especially when one told me that my insurance would not cover any accident during the pregnancy, travel agencies didn’t want to do it. I joined my friends sometimes…. I felt a lot of anger...It was unfair. I quit during 3 or 4 years. Now I think I could have kept climbing but at that time I followed everything others told me about avoiding risk. |
| Es complicado, hay quienes de plano te toman por loca, otros tonta o por idiota… pero yo creo que sit u cuerpo responde yo creo que sí puedes seguir con tu práctica. | It isn’t easy, for some people you are like crazy, others consider you are nuts or even stupid… but if your body responds to you I think you should keep practicing adventure activities |
| Pues ya sabes, tu cuerpo cambia incluso si estás en Buena forma pesas más y te vuelves menos ágil… engordas de la cintura y las caderas…. no es que te vayas a ver ridícula… es como que todo te toma el doble de energía…¿no? cuando estaba embarazada como que me hubiera gustado que existieran instalaciones de rappel para mujeres embarazadas…creo que es buena idea…si hasta hay clases de yoga para embarazadas ¿por qué no?. | ...you know, your body changes and even if you are in a good shape as your weight increases you are less agile too… your belly and hips fatten too….it wasn’t that I felt ridiculous….it was more that it takes you twice as much energy…. but you know, when I was pregnant I wished there could be some indoor abseiling facilities for pregnant women….it seemed like a good idea to me...if there are yoga class for pregnant woman, why not? |
| Creo que algunos médicos son más tradicionales que otros, mi ginecóloga por ejemplo practicaba actividades de aventura… y ella me dió algunos consejos pero no prohibitivos o cosa así. | I think that some doctors are more traditional and others are less, in my case my gynaecologist was a woman who also, eventually, practiced adventure activities… so she gave me some advice but it didn’t feel like a warning or something. |
| Muchos años estuve fuera del país cuando mi primer embarazo y allá los médicos son menos tradicionales y la gente hace más actividades al exterior…creo que eso es importante. Y durante mi Segundo embarazo fue cuando el médico me dijo que fuera más cuidadosa y de dejar de hacer rafting…nada me había pasado antes y entonces pues no me dió miedo. Tengo muy Buenos amigos que me animaron a no parar y pues fue positivo aunque no siempre fue así. | I lived abroad during my first pregnancy and doctors we’re not as traditional as in Mexico and people are more used to outdoor activities...so I think it was important. So during my second pregnancy when a doctor told me about being careful I just didn’t consider stop practicing kayaking…. nothing had happened to me before, so it was safe. I had very good friends who encouraged me and took care of me so I didn’t feel like an expat...although at one point I did feel that way. |
| Como está el factor riesgo y el sentirse libre pues no es raro que enfrentes cuestionamientos …pero pues piensas hey! Ya pasó, ahora cuando estás embarazada y sigues con el rafting pues si es un reto…hasta te preguntas si vas a resultar una mala mama por arriesgar a tu bebé desde antes de nacer. | Since you enjoy risk and freedom in adventure activities and you have faced some gendered questioning…. you think…. hey! it’s over, but to be pregnant and to keep practicing rafting is still a challenge… you even ponder if you really will be a bad mother because you put your baby at risk before birth. |
| Hay una etapa, en los últimos dos meses que tu cuerpo pesa más y sientes como que te mueves en cámara lenta y es poco cómodo… y pues la aventura no está como que afuerita de tu casa y tienes que salir y pues como que no es agradable ¿no?. | there is a time, during the last two months [of the pregnancy] that your body is heavy and it feels like you move in slow motion and it becomes uncomfortable…. you know, the adventure isn’t near your house so you have to travel and it is less enjoyable. |
| “Te vuelves más segura…no sé, así lo vives, dar a luz es un lío pero te sientes también segura al mismo tiempo. Fue importante el embarazo y seguir con el kayak…fue bueno. | I became more confident… I don´t know I felt that way, to give birth can be messy but it’s powerful at the same time. I was strong so to experience pregnancy with all that questioning and continue kayaking...it was good. |
| Pues te haces más voluminosa y lenta, a la larga puedes hacer la actividad pero te sientes culpable por ir retrasando a los demás pero pues yo tengo unos compañeros increíbles que me cuidaban y me animaban todo el tiempo ¿no?. | well, you get bigger and slower, eventually you know you can practice the activity but you feel sorry for slowing down the others...but you know? I just had fantastic mates they not only took care of me but also encouraged me all the time. |
| Puedes hacer como que no pasa nada, aún cuando no sea agradable pues cambia tu cuerpo, tu mente ¿no? cuando haces cosas de Aventura ambos van juntos, pues los don cambian…pero el cambio es OK…pues solo tienes que aceptarlo, no ire n su contra, sit e sientes mal, pues paras, o si hay que descansar pues lo haces…pero no debes de dejar que otros decidan por ti. | You can’t pretend nothing will happen, even if you dislike [the fact that] your body will change, your mind you know? in adventure activities both are inseparable, well both will change...but change it’s ok...so you just have to face it, not fight against, this isn’t a fight, if you feel bad, stop doing it, or if you have to rest, you have to rest…. but don’t allow others to decide [on your behalf]. |
| Hace años que las embarazadas se quedaban en su casa y hacer ejercicio estaba prohibidísimo, pero las cosas cambian y mientras tu cuerpo responda pues no hay riesgo, así que solo le das la bienvenida a tu nuevo cuerpo y adelante [risas]. | decades ago pregnant woman had to rest in their homes, physical exercise was banned, decades later it was ok to do some sports, but things keep changing and as long as your body responds you aren’t risking anything, so just welcome your new temporal body and go for it [laughs]. |
| Nada te queda, usas zapatos más grandes y ropa también puede ser muy caro. | nothing fits you, you have to use bigger footwear and clothing and it can be very expensive. |
| El arnés no está diseñado para embarazadas…sí hay pero no es fácil comprarlos. Yo tuve uno de segunda mano que una chica trajo de Canadá, y cuando ya no lo necesité se lo vendí a pasé a otra embarazada. Pero yo tuve suerte no es sencillo poder comprarlos. | Harnesses aren’t designed for pregnant women… there are some but it isn’t easy to get them. I could get one because I bought it second hand from a woman who bought it in Canada, and when I didn’t need it I sold it to another pregnant climber. But I was lucky it isn’t easy to get one of them. |
| No me parece que eso sea importante para el rafting...depende de tu cuerpo también…algunas mujeres no experimentan lo mismo [durante el embarazo] ni en la misma medida…solo me molesté cuando mi salvavidas dejó de cerrarme. | I don’t think that this will be relevant for rafting…. it depends on the body too… some women don’t experience the same symptoms [during pregnancy] nor in the same degree… I just disliked my body when my life saver didn’t close. |
| Para mí el riesgo es básico, siempre me gustaron hacer cosas fuera, desde niña. Me sentía bien de hacer cosas distintas al resto…me gustaba ser diferente, es lo que me hizo quien soy. Pensar dónde vas, planear el viaje, hacer la actividad, te cambia, te vuelves más fuerte y eso se nota. | To me.. risk is something vital, I always liked outdoor activities and practiced them since I was a child. I felt good while doing something different from the rest… it was nice to be different I was able to create who I am. To think were you are going, to plan the trip, to practice [adventure activities], it shapes you, it changes you, it makes you strong and you project it |
| Cuando alguien me desaconsejó pensé que estaba sana…en buena forma…que me gustaba hacerlo…que mi bebé estaba bien y entonces ¿por qué parar? | when someone intended to convince me to stop I considered I was healthy… I was in a good shape… I felt good…. I enjoyed the experience… my baby was fine too…Why stop then? |
| Fue más complicada la primera vez…pues porque…todo es más difícil la primera vez.. dejé entonces de escalar después del 5to mes…mucha gente…mi familia, mis amigos me criticaban…primero traté de tomarlo con buen humor pero al final te cansa…hasta mi esposo me criticaba. Cuando me embaracé de mi segundo hijo tampoco fue fácil porque me criticaban también pero yo estaba más preparada y tenía más experiencia y eso lo hizo menos complicado. | It was more difficult the first time...because...you know everything is more difficult the first time… I stopped climbing after the 5th month… a lot of people...my family and friends both questioned me… first I tried to make fun of their questioning but at the end I was tired…. even my husband questioned me. When I became pregnant of my second child it was...not easy because I also faced some questioning but I was more prepared and had more experience so it was less difficult. |
| Mi mamá no es como que la típica mamá mexicana, y fíjate mis hermanos y yo sobrevivimos…así que eso me dio confianza y también fue de gran ayuda. | My mother is not … like the typical Mexican mother, so it was like hey! my brothers and I survived… I was confident and it was very helpful. |
